# Supplementary material
Source: publisher site journal article supplement (https://www.spandidos-publications.com/8371/downloadSupplementary)
Supplement: Supplementary file 1 [file downloadSupplementary]

## Sheet: Sheet1
Table SI. Acute-phase proteins.
Gene symbol	Description	Uniprot ID	Relevance score
HP	Haptoglobin	P00738	13.2393
SAA1	Serum Amyloid A1	P0DJI8	10.7368
CRP	C-Reactive Protein	P02741	8.68509
IL6	Interleukin 6	P05231	6.81506
LBP	Lipopolysaccharide Binding Protein	P18428	6.29707
STAT3	Signal Transducer And Activator Of Transcription 3	P40763	5.45181
SAA2	Serum Amyloid A2	P0DJI9	5.39854
ALB	Albumin	P02768	4.95601
SERPINA3	Serpin Family A Member 3	P01011	4.8685
TTR	Transthyretin	P02766	4.74974
LIF	LIF Interleukin 6 Family Cytokine	P15018	4.70273
SAA4	Serum Amyloid A4, Constitutive	P35542	4.66006
HPX	Hemopexin	P02790	4.54103
TF	Transferrin	P02787	4.4604
SERPINA1	Serpin Family A Member 1	P01009	4.29374
ITIH4	Inter-Alpha-Trypsin Inhibitor Heavy Chain 4	Q14624	4.27335
CP	Ceruloplasmin	P00450	3.63013
IL1RN	Interleukin 1 Receptor Antagonist	P18510	3.34189
ORM1	Orosomucoid 1	P02763	3.34189
TNF	Tumor Necrosis Factor	P01375	3.30439
IL6R	Interleukin 6 Receptor	P08887	3.10305
CD14	CD14 Molecule	P08571	2.92002
LCN2	Lipocalin 2	P80188	2.918
IL6ST	Interleukin 6 Cytokine Family Signal Transducer	P40189	2.84672
SOCS3	Suppressor Of Cytokine Signaling 3	O14543	2.72763
IL1RAPL2	Interleukin 1 Receptor Accessory Protein Like 2	Q9NP60	2.68856
CNTF	Ciliary Neurotrophic Factor	P26441	2.56689
AHSG	Alpha 2-HS Glycoprotein	P02765	2.49896
HPR	Haptoglobin-Related Protein	P00739	2.46813
INS	Insulin	P01308	2.46267
HAMP	Hepcidin Antimicrobial Peptide	P81172	2.46267
IL1B	Interleukin 1 Beta	P01584	2.29303
JAK1	Janus Kinase 1	P23458	2.24492
A2M	Alpha-2-Macroglobulin	P01023	2.22907
PTPN11	Protein Tyrosine Phosphatase Non-Receptor Type 11	Q06124	2.18943
TYK2	Tyrosine Kinase 2	P29597	2.18943
CTSB	Cathepsin B	P07858	2.18943
TFRC	Transferrin Receptor	P02786	2.18943
GPS2	G Protein Pathway Suppressor 2	Q13227	2.15494
SERPINA2	Serpin Family A Member 2 (Gene/Pseudogene)	P20848	2.12643
CPN1	Carboxypeptidase N Subunit 1	P15169	2.05171
IL22	Interleukin 22	Q9GZX6	2.05171
IL11	Interleukin 11	P20809	2.03008
SERPINE1	Serpin Family E Member 1	P05121	1.95912
IL1R1	Interleukin 1 Receptor Type 1	P14778	1.95912
LIFR	LIF Receptor Subunit Alpha	P42702	1.92097
PLA2G2A	Phospholipase A2 Group IIA	P14555	1.92097
LY96	Lymphocyte Antigen 96	Q9Y6Y9	1.92097
BMP6	Bone Morphogenetic Protein 6	P22004	1.88064
IL18R1	Interleukin 18 Receptor 1	Q13478	1.88064
APCS	Amyloid P Component, Serum	P02743	1.88064
NR1H2	Nuclear Receptor Subfamily 1 Group H Member 2	P55055	1.85625
APOA1	Apolipoprotein A1	P02647	1.74137
PPARA	Peroxisome Proliferator Activated Receptor Alpha	Q07869	1.74137
NID1	Nidogen 1	P14543	1.71923
PTX3	Pentraxin 3	P26022	1.71154
JAK2	Janus Kinase 2	O60674	1.68587
SRC	SRC Proto-Oncogene, Non-Receptor Tyrosine Kinase	P12931	1.68587
LTF	Lactotransferrin	P02788	1.68587
C4BPA	Complement Component 4 Binding Protein Alpha	P04003	1.68587
PPARG	Peroxisome Proliferator Activated Receptor Gamma	P37231	1.62288
SCARB1	Scavenger Receptor Class B Member 1	Q8WTV0	1.62288
RBP4	Retinol Binding Protein 4	P02753	1.62288
STAT1	Signal Transducer And Activator Of Transcription 1	P42224	1.54816
APP	Amyloid Beta Precursor Protein	P05067	1.54816
ABCA1	ATP Binding Cassette Subfamily A Member 1	O95477	1.54816
CD79A	CD79a Molecule	P11912	1.54816
GRB2	Growth Factor Receptor Bound Protein 2	P62993	1.54816
C5AR1	Complement C5a Receptor 1	P21730	1.54816
AMBP	Alpha-1-Microglobulin/Bikunin Precursor	P02760	1.54816
HGFAC	HGF Activator	Q04756	1.54816
ANGPT4	Angiopoietin 4	Q9Y264	1.54816
ZFYVE9	Zinc Finger FYVE-Type Containing 9	O95405	1.54816
LRG1	Leucine Rich Alpha-2-Glycoprotein 1	P02750	1.54816
H4C16	H4 Histone 16	P62805	1.54816
NR5A2	Nuclear Receptor Subfamily 5 Group A Member 2	O00482	1.52377
MPO	Myeloperoxidase	P05164	1.45078
CAPN1	Calpain 1	P07384	1.45078
SERPINC1	Serpin Family C Member 1	P01008	1.45078
GATA4	GATA Binding Protein 4	P43694	1.45078
PTGS2	Prostaglandin-Endoperoxide Synthase 2	P35354	1.45078
CLU	Clusterin	P10909	1.45078
NEU1	Neuraminidase 1	Q99519	1.45078
CCN2	Cellular Communication Network Factor 2	P29279	1.45078
CHI3L1	Chitinase 3 Like 1	P36222	1.45078
SOCS1	Suppressor Of Cytokine Signaling 1	O15524	1.45078
ANG	Angiogenin	P03950	1.45078
CISH	Cytokine Inducible SH2 Containing Protein	Q9NSE2	1.45078
HABP2	Hyaluronan Binding Protein 2	Q14520	1.45078
EPO	Erythropoietin	P01588	1.45078
SOCS2	Suppressor Of Cytokine Signaling 2	O14508	1.45078
ANKRD1	Ankyrin Repeat Domain 1	Q15327	1.45078
MUC4	Mucin 4, Cell Surface Associated	Q99102	1.45078
SIGLEC5	Sialic Acid Binding Ig Like Lectin 5	O15389	1.45078
SOD2-OT1	SOD2 Overlapping Transcript 1		1.45078
AFP	Alpha Fetoprotein	P02771	1.21568
COL4A1	Collagen Type IV Alpha 1 Chain	P02462	1.21568
F12	Coagulation Factor XII	P00748	1.21568
MIF	Macrophage Migration Inhibitory Factor	P14174	1.21568
XDH	Xanthine Dehydrogenase	P47989	1.21568
COL4A2	Collagen Type IV Alpha 2 Chain	P08572	1.21568
COL4A3	Collagen Type IV Alpha 3 Chain	Q01955	1.21568
LAMA1	Laminin Subunit Alpha 1	P25391	1.21568
COL4A4	Collagen Type IV Alpha 4 Chain	P53420	1.21568
LINC01672	Long Intergenic Non-Protein Coding RNA 1672		1.21568
OSM	Oncostatin M	P13725	1.10271
MBL2	Mannose Binding Lectin 2	P11226	1.07735
